# Supplementary material for: Improving distress in dialysis (iDiD): a feasibility two-arm parallel randomised controlled trial of an online cognitive behavioural therapy intervention with and without therapist-led telephone support for psychological distress in patients undergoing haemodialysis
Source: PubMed Central journal article supplement — BMJ Open. 2016 Apr 12;6(4):e011286. doi: 10.1136/bmjopen-2016-011286 (PMC4838682; doi:10.1136/bmjopen-2016-011286), 2016-04-12
Supplement: bmjopen-2016-011286supp_table.pdf [file bmjopen-2016-011286supp_table.pdf]

**Supplementary table 1: Summary of iDiD online treatment sessions**

| Session                              | Content                                                                                                                                                                                                                                                                                                                                                                                                                                                                                                                                                                                                                     |
|--------------------------------------|-----------------------------------------------------------------------------------------------------------------------------------------------------------------------------------------------------------------------------------------------------------------------------------------------------------------------------------------------------------------------------------------------------------------------------------------------------------------------------------------------------------------------------------------------------------------------------------------------------------------------------|
| 1. What is end-stage renal failure?  | <p>-Psycho-education including information about:</p> <ul style="list-style-type: none"> <li>-ESKD and its treatment.</li> <li>-Expectation management concerning the effectiveness of dialysis treatments and its psycho-social consequences.</li> <li>-The rationale for specific ESKD treatments (i.e. improving physical health) and psychological interventions (i.e. improving emotional health).</li> <li>-Normalising the experience of distress in the context of dialysis.</li> </ul>                                                                                                                             |
| 2. Why do I feel distressed?         | <p>-Recaps on information learnt about in session 1.</p> <p>-Self-generation of a personal model of distress. Patients self-identify their own vicious cycle to improve their understanding of the inter-relationships between ESKD specific stressors (triggers), feelings, thoughts, behaviours, and physical symptoms.</p> <p><i>Between session task:</i> Recap on the content of session 2 by re-reading the session.</p>                                                                                                                                                                                              |
| 3. Dealing with my negative feelings | <p>-Recaps on information learnt about in session 2.</p> <p>-Revision of reinforcing relationship between unhelpful coping behaviours and the maintenance of psychological distress.</p> <p>-Explanation of positive emotion regulation strategies including: behavioural activation, emotional expression, graded exposure, and tips for improving the quality of sleep. Patients are also informed of the value of acceptance, relaxation, and physical exercise.</p> <p><i>Between session task:</i> Selection of a helpful coping strategy for managing negative emotions before completion of next online session.</p> |

|                                                                     |                                                                                                                                                                                                                                                                                                                                                                                                                                                                                                                                                                                                                                                                                                        |
|---------------------------------------------------------------------|--------------------------------------------------------------------------------------------------------------------------------------------------------------------------------------------------------------------------------------------------------------------------------------------------------------------------------------------------------------------------------------------------------------------------------------------------------------------------------------------------------------------------------------------------------------------------------------------------------------------------------------------------------------------------------------------------------|
| <p>4. Tackling unhelpful thoughts about end-stage renal disease</p> | <p>-Recaps on information learnt about in session 3.</p> <p>-Examples of unhelpful thoughts typical in people with ESKD provided.</p> <p>-Information and skill development on the identification of unhelpful thoughts using thought records.</p> <p>-Explanation of how to challenge and gradually alter unhelpful thinking styles by generating alternatives.</p> <p><i>Between session task:</i> Continue working on goals from session three (if useful) and complete a thought record if relevant to their personal needs.</p>                                                                                                                                                                   |
| <p>5. Goal setting and problem solving</p>                          | <p>-Recaps on information learnt about in session 4.</p> <p>-The rationale for “SMART” goals and how to use the technique is explained in depth.</p> <p>-Information about the value of activity monitoring, behavioural activation, and action planning.</p> <p>-Explanation of the seven steps to problem solving technique is introduced. Use to foster confidence in illness self-management.</p> <p><i>Between session task:</i> Continue working on goals from previous sessions that remain useful and relevant. If applicable implement one of the following: i) “SMART” goal techniques, ii) activity monitoring/behavioural activation, or iii) seven steps to problem solving approach.</p> |
| <p>6. Managing difficult social relationships</p>                   | <p>-Recaps on information learnt about session 5</p> <p>-Case examples of social situations people with ESKD find challenging (i.e. dealing with medical</p>                                                                                                                                                                                                                                                                                                                                                                                                                                                                                                                                           |

|                                                       |                                                                                                                                                                                                                                                                                                                                                                                                                                                                                                                                                                                                                                                                                                                                                                            |
|-------------------------------------------------------|----------------------------------------------------------------------------------------------------------------------------------------------------------------------------------------------------------------------------------------------------------------------------------------------------------------------------------------------------------------------------------------------------------------------------------------------------------------------------------------------------------------------------------------------------------------------------------------------------------------------------------------------------------------------------------------------------------------------------------------------------------------------------|
|                                                       | <p>professionals) provided.</p> <ul style="list-style-type: none"> <li>-Introduction to assertiveness concept and its effects on physical and psychological health.</li> <li>-Case examples provided of how others behave assertively in ESKD specific social contexts to allow participants to adapt for their own use.</li> <li>-Reflection on social support network and whether there is scope to improve it to meet physical, emotional, and informational needs.</li> </ul> <p><i>Between session tasks:</i> Continue working on goals from previous sessions that remain useful and relevant. If feasible/applicable implement: a potential assertive responses to a stressful social situation or reflect on social support networks and how to optimise them.</p> |
| <p>7. Progress recap and preparing for the future</p> | <ul style="list-style-type: none"> <li>-Recaps on the progress made over the previous six sessions by encouraging patients to reflect on their new skills and achieved goals.</li> <li>-Generation of action plans to continue using skills moving forward. Identification of a specific action plan to implement when an acute stressful situations arises.</li> </ul>                                                                                                                                                                                                                                                                                                                                                                                                    |
